# Supplementary material for: On the relevance of source effects in geomagnetic pulsations for induction soundings
Source: Copernicus journal article supplement (doi:10.5194/angeo-36-337-2018), 2018-03-07
Supplement: Supplementary file 1 [file angeo-36-337-2018-supplement.zip]

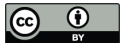

## *Supplement of*

# **On the relevance of source effects in geomagnetic pulsations for induction soundings**

**Anne Neska et al.**

*Correspondence to:* Anne Neska ([anne@igf.edu.pl](mailto:anne@igf.edu.pl))

- [angeo-36-337-2018-supplement-title-page.pdf](#)
- KIV.1
- KIV.2
- KIV.ddf
- ODE1.1
- ODE1.2
- ODE1.ddf
- ODE2.1
- ODE2.2
- ODE2.ddf
- SUW\_8s.1
- SUW\_8s.2
- SUW\_8s.ddf

The copyright of individual parts of the supplement might differ from the CC BY 3.0 License.
